# Supplementary material for: A Coupled Modeling Framework for Sustainable Watershed Management in Transboundary River Basins
Source: Copernicus journal article supplement (doi:10.5194/hess-2017-480), 2017-08-09
Supplement: Supplementary file 1 [file hess-2017-480-supplement.pdf]

## S1 Review of ABM applications

Table S1: Selected relevant existing studies of ABM applications in surface water management and ecological modeling

| Topics                               | Literature                      | Agent types                | Agents' decisions                        | Agents' goal                          | Hierarchical agents | Direct agent interaction | Link with other models   |
|--------------------------------------|---------------------------------|----------------------------|------------------------------------------|---------------------------------------|---------------------|--------------------------|--------------------------|
| Watershed management - Surface water | Barreteau et al. (2004)         | farmers                    | farm activities                          | simulate cultivating activities       | Yes                 | Yes                      | No                       |
|                                      | Berger et al. (2007)            | water users                | bid on land/water resources              | max incomes                           | No                  | Yes                      | Yes - hydrological model |
|                                      | Brady et al. (2012)             | farmers                    | farm activities                          | max incomes                           | No                  | Yes                      | No                       |
|                                      | Farolfi et al. (2010)           | farms/villages             | water demand                             | simulate water demand                 | No                  | No                       | No                       |
|                                      | Giacomoni et al. (2013)         | consumers/policy makers    | water use/water restrict                 | simulate water demand                 | Yes                 | Yes                      | Yes - SWAT               |
|                                      | Giuliani and Castelletti (2013) | reservoirs/delta           | reservoir operation                      | max HP/delta preservation             | No                  | Yes                      | No                       |
|                                      | Giuliani et al. (2015)          | farm/city                  | water use                                | max profit                            | No                  | No                       | No                       |
|                                      | Jeuland et al. (2014)           | reservoirs                 | reservoir operation                      | max profit                            | No                  | No                       | No                       |
|                                      | Kanta and Zechman (2014)        | households/policy makers   | conservation action/policy               | simulate water demand                 | Yes                 | Yes                      | No                       |
|                                      | Ng et al. (2011)                | farmers                    | crop/BMP choices                         | max profit                            | No                  | No                       | Yes - SWAT               |
|                                      | Schluter et al. (2009)          | farmers/lake/policy makers | water use                                | max profit                            | Yes                 | Yes                      | No                       |
|                                      | Schwarz and Ernst (2009)        | households                 | adoption of new water-related technology | simulate technology diffusion         | No                  | Yes                      | No                       |
|                                      | Yang et al. (2009)              | farm/city                  | water use                                | max profit/min violation              | No                  | No                       | No                       |
| Yang et al. (2011)                   | subbasins                       | water use/water trading    | max profit                               | No                                    | Yes                 | No                       |                          |
| Ecologic modeling                    | Bagstad et al., (2013)          | carriers/sink/users of ES  | carry/affect/use ES                      | simulate ES flow path                 | No                  | Yes                      | No                       |
|                                      | Miller et al. (2014)            | waterfowls                 | search food in foraging patches          | simulate different impact on foraging | No                  | No                       | No                       |
|                                      | Sun and Müller (2013)           | farms                      | land use/land conservation               | max profit                            | No                  | Yes                      | No                       |

## S2 SWAT model setup

The data used to set up the SWAT models for the two study river basins are shown in Table S2. SWAT is a semi-distributed model. In model setup, the Mekong River Basin is partitioned into 289 subbasins (Fig. S1(a)), and the Niger River Basin is divided into 178 subbasins (Fig. S1(b)). Hydrological response units (HRUs) were defined within subbasins to reflect the spatial variability of land use/land cover and soil. For this study, we defined crop HRUs for rainfed and irrigated upland crops and rice. The initial size of crop HRUs was estimated using cropping area data from International Food Policy Research Institute (IFPRI)'s SPAM database (You et al., 2014), which disaggregates national/sub-national crop production stations to a 5 arc minute grid.

The SWAT models contain customized modules to simulate storage and water surface variations of two major natural water impoundments: the Tonlé Sap in the Mekong River Basin and the Inner Niger Delta in the Niger River Basin. The storage variations of the Tonlé Sap and the Inner Niger Delta were modeled by following the approaches by Kirby et al. (2006) and Thompson et al.(2016), in which statistical relationships were developed to relate the outflow of the Tonlé Sap to streamflows at Kratie and outflow of the Inner Niger Delta at Diré to flows at Ké-Macina and Bénény Kégny. The water surface areas of the two water impoundments were further calculated using volume-surface relationship developed by Manley (2015) and Ogilvie (2017, personal communication).

Table S2: Data for SWAT model setup

| Category                                                  | Data                                                                                                                                                             |
|-----------------------------------------------------------|------------------------------------------------------------------------------------------------------------------------------------------------------------------|
| Elevation                                                 | HydroSHEDS <sup>1</sup>                                                                                                                                          |
| Land use/land cover                                       | GLC2000 <sup>2</sup> & SPAM 2005 <sup>3</sup>                                                                                                                    |
| Soil                                                      | Soil Map of the World <sup>4</sup>                                                                                                                               |
| Precipitation                                             | Mekong: APHRODITE <sup>5</sup><br>Niger: NCEP-CFSR <sup>6</sup> (monthly totals were corrected using monthly precipitation data in CRU TS v. 4.00 <sup>7</sup> ) |
| Temperatures/solar radiation/relative humidity/wind speed | NCEP-CFSR                                                                                                                                                        |

1. Source: The SHuttle Elevation Derivatives at multiple Scales (HydroSHEDS) database <http://www.hydrosheds.org/>
2. Source: Global Land Cover (GLC) 2000 database. European Commission, Joint Research Centre. <http://forobs.jrc.ec.europa.eu/products/glc2000/glc2000.php>
3. Source: Spatial Production Allocation Model (SPAM) database for 2005, IFPRI. <http://mapspam.info/>
4. Source: FAO/UNESCO. <http://www.fao.org/soils-portal/soil-survey/soil-maps-and-databases/faounesco-soil-map-of-the-world/en/>
5. Source: Asian Precipitation-Highly Resolved Observational Data Integration Towards the Evaluation of Water Resources (APHRODITE) project. <http://www.chikyu.ac.jp/precip/english/conditions.html>
6. Source: National Centers for Environmental Prediction (NCEP) Climate Forecast System Reanalysis (CFSR); downloaded via global weather database for SWAT <https://globalweather.tamu.edu/>
7. Source: Climatic Research Unit - University of East Anglia. <http://www.cru.uea.ac.uk/data>

### S3 Sub-basin Delineation

(a) Mekong

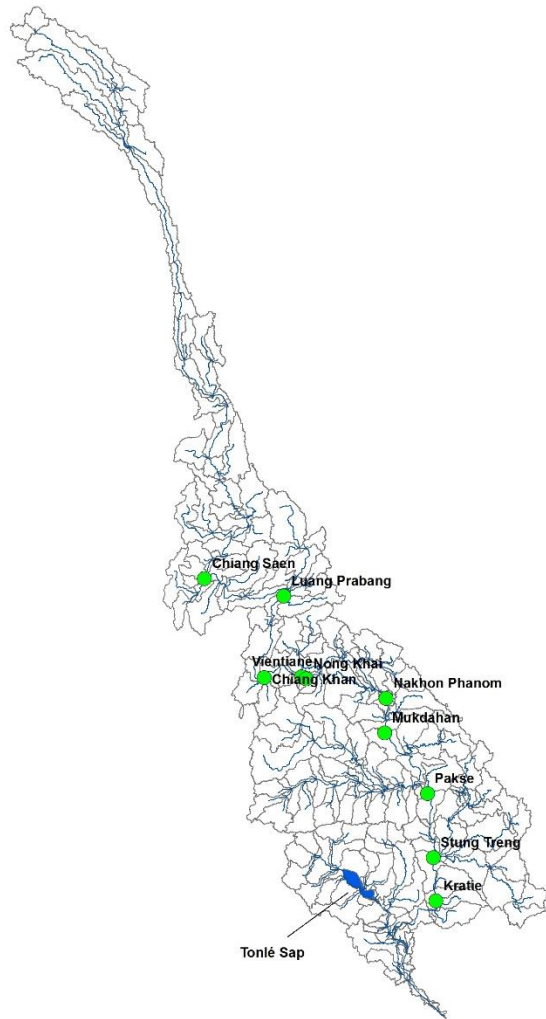

(b) Niger

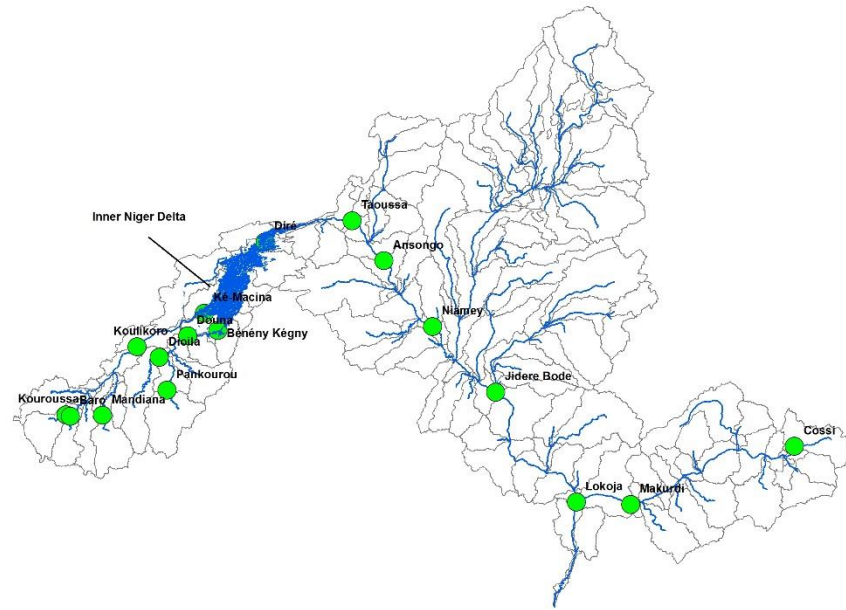

Figure S1 Watershed delineation schemes and locations of streamflow stations used in model calibration/validation

#### S4 Model Calibration and Validation

The SWAT-Mekong model was calibrated and validated using daily streamflow data from 10 gauging stations, while for the Niger River basin, model calibration and validation was conducted on a monthly basis. The data were obtained from L'Institut de recherche pour le développement (IRD), Niger Basin Authority (NBA) and Global Runoff Data Centre (GRDC). The calibration/validation periods and the model fits achieved by the SWAT model in both case studies are shown in Figures S2 and S3, and Table S3 (a) and (b).

Table S3: Nash–Sutcliffe model efficiency coefficient

#### Mekong

| Station       | Calibration (1983-1992) | Validation (1993-2007) |
|---------------|-------------------------|------------------------|
| Chiang Saen   | 0.51                    | 0.62                   |
| Luang Prabang | 0.73                    | 0.80                   |
| Chiang Khan   | 0.70                    | 0.82                   |
| Vientiane     | 0.71                    | 0.82                   |
| Nong Khai     | 0.74                    | 0.82                   |
| Nakhon Phanom | 0.80                    | 0.84                   |
| Mukdahan      | 0.85                    | 0.84                   |
| Pakse         | 0.82                    | 0.85                   |
| Stung Treng   | 0.82                    | 0.84                   |
| Kratie        | 0.83                    | 0.85                   |

#### Niger

| Station      | Calibration (1985-1994) | Validation (1995-2010) |
|--------------|-------------------------|------------------------|
| Ansongo      | 0.88                    | 0.50                   |
| Baro         | 0.80                    | 0.33                   |
| Beneny Kegny | 0.68                    | 0.73                   |
| Cossi        | 0.81                    | 0.08                   |
| Dioila       | 0.71                    | 0.67                   |
| Dire         | 0.87                    | 0.83                   |
| Douna        | 0.73                    | 0.81                   |
| Jidere Bode  | 0.89                    | 0.72                   |
| Koulikoro    | 0.92                    | 0.72                   |
| Kouroussa    | 0.81                    | 0.40                   |
| Ke Macina    | 0.88                    | 0.66                   |
| Lokoja       | 0.86                    | 0.72                   |
| Makurdi      | 0.81                    | 0.87                   |
| Mandiana     | 0.65                    | 0.42                   |
| Niamey       | 0.80                    | 0.28                   |
| Pankourou    | 0.35                    | 0.68                   |
| Taoussa      | 0.85                    | 0.40                   |

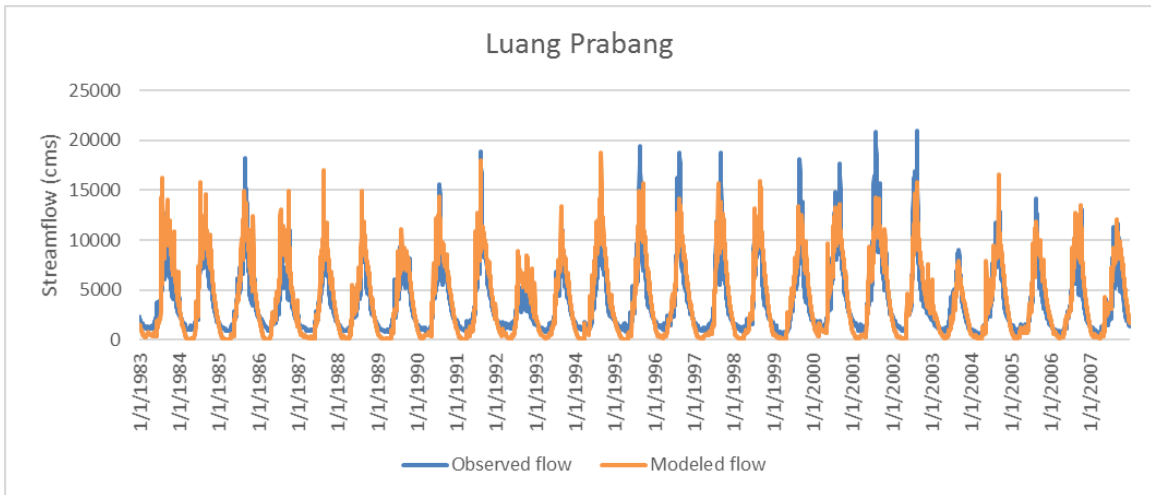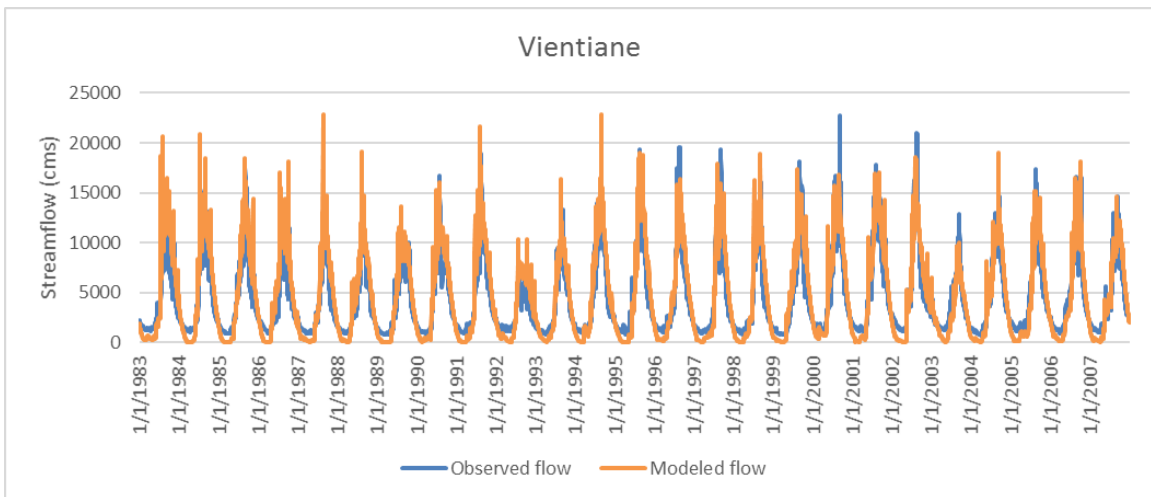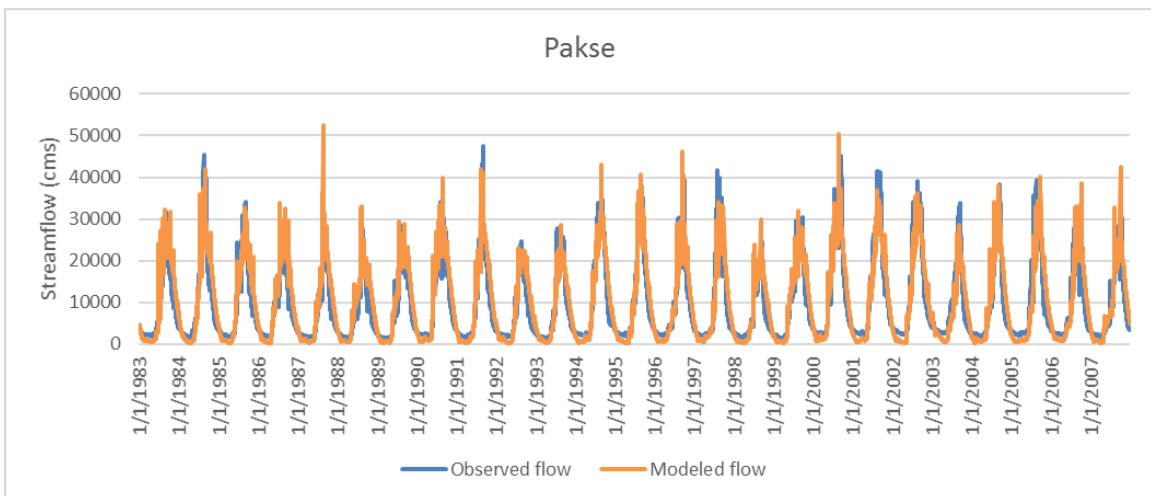

**Figure S2: Simulated and observed streamflow at different locations along the Mekong River**

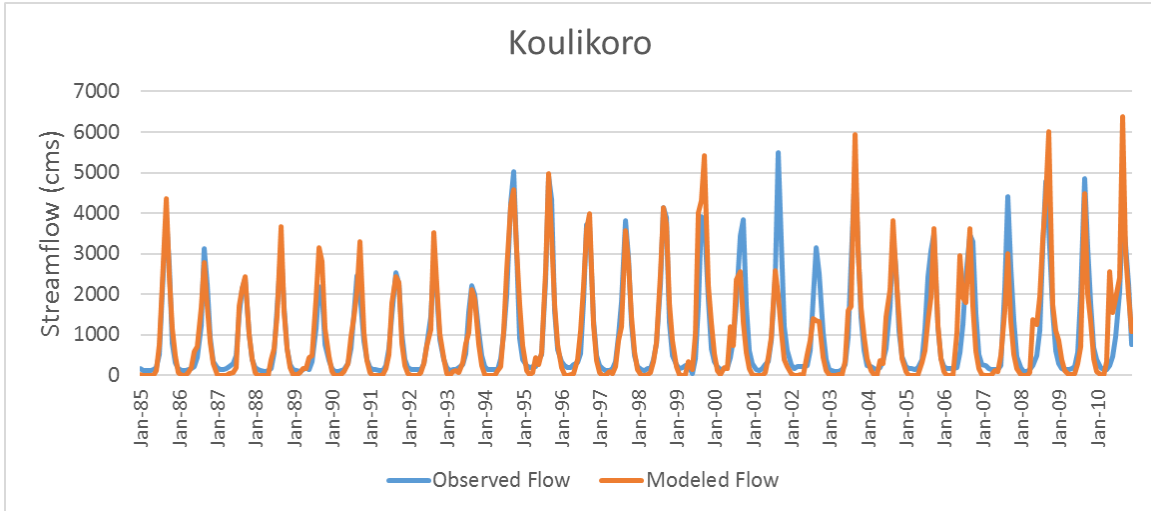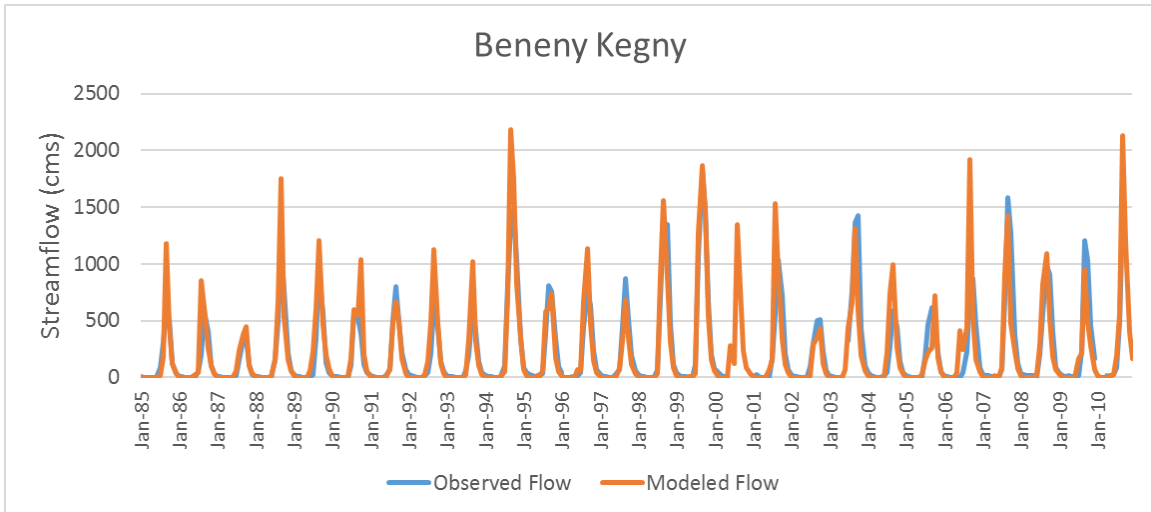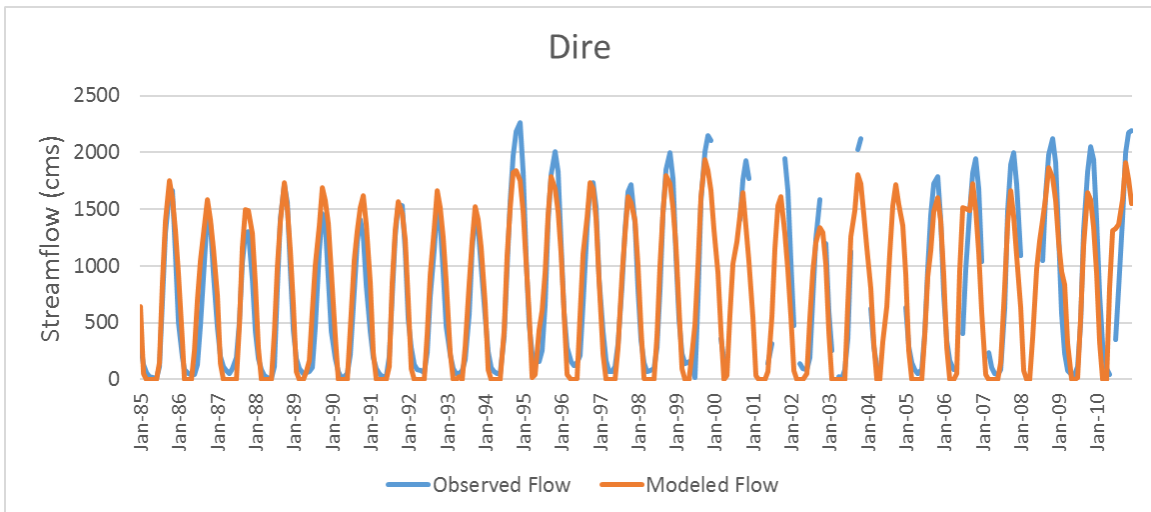

**Figure S3: Simulated and observed streamflow at different locations along the Niger River**

## Comparison of modeled and observed hydropower generation

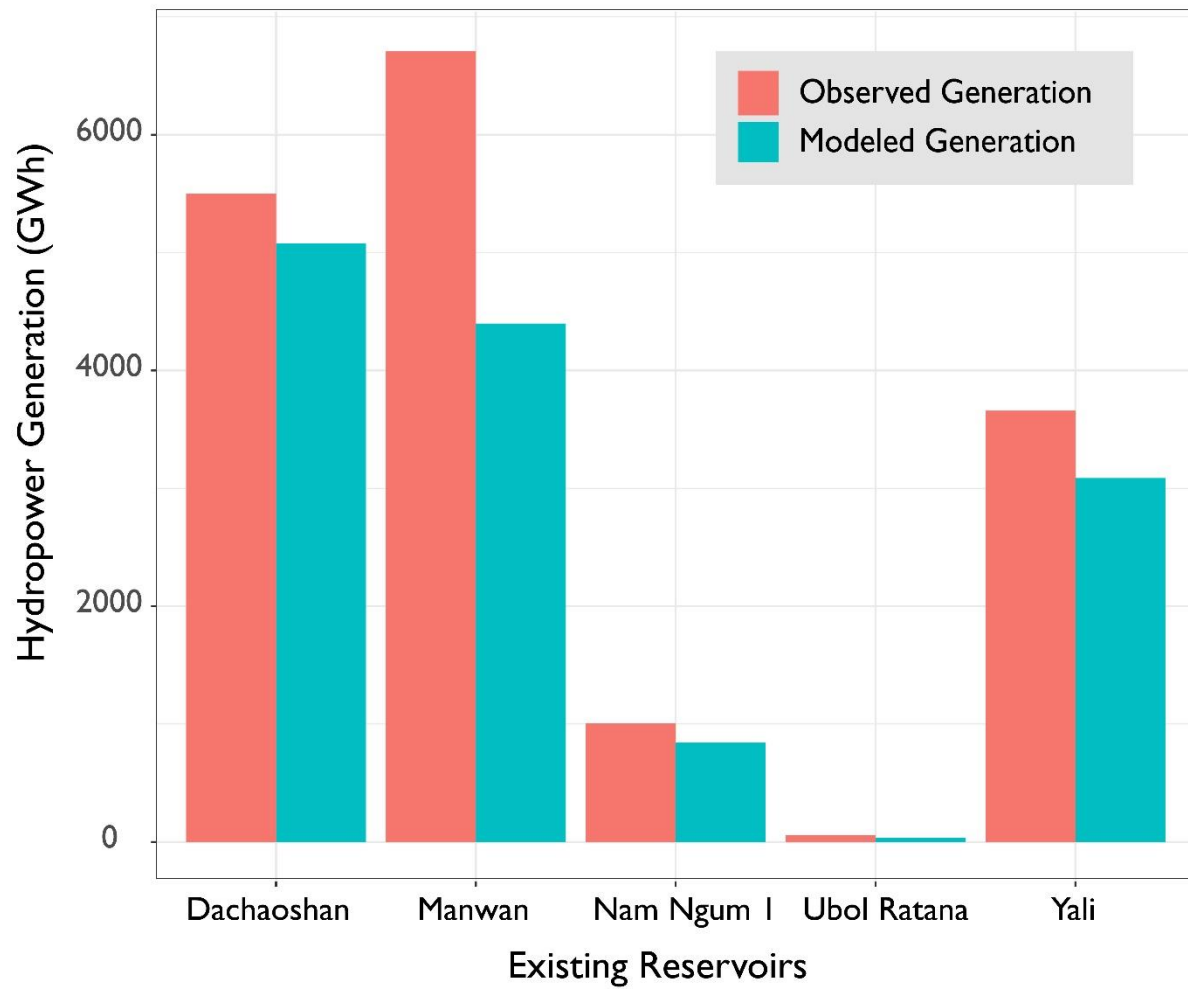

Figure S4: Comparison of simulated hydropower generated using the SWAT module under historic streamflow with observed generation in the Mekong River Basin

## S5 References

- Bagstad, K. J., Johnson, G. W., Voigt, B. and Villa, F.: Spatial dynamics of ecosystem service flows: A comprehensive approach to quantifying actual services, *Ecosyst. Serv.*, 4, 117–125, doi:10.1016/j.ecoser.2012.07.012, 2013.
- Barreteau, O., Bousquet, F., Millier, C. and Weber, J.: Suitability of Multi-Agent Simulations to study irrigated system viability: Application to case studies in the Senegal River Valley, *Agric. Syst.*, 80(3), 255–275, doi:10.1016/j.agry.2003.07.005, 2004.
- Berger, T., Birner, R., Diaz, J., McCarthy, N. and Wittmer, H.: Capturing the complexity of water uses and water users within a multi-agent framework, *Integr. Assess. Water Resour. Glob. Chang. A North-South Anal.*, 129–148, doi:10.1007/978-1-4020-5591-1-9, 2007.
- Brady, M., Sahrbacher, C., Kellermann, K. and Happe, K.: An agent-based approach to modeling impacts of agricultural policy on land use, biodiversity and ecosystem services, *Landsc. Ecol.*, 27(9), 1363–1381, doi:10.1007/s10980-012-9787-3, 2012.
- Farolfi, S., Müller, J. P. and Bonté, B.: An iterative construction of multi-agent models to represent water supply and demand dynamics at the catchment level, *Environ. Model. Softw.*, 25(10), 1130–1148, doi:10.1016/j.envsoft.2010.03.018, 2010.
- Giacomoni, M. H., Kanta, L. and Zechman, E. M.: Complex Adaptive Systems Approach to Simulate the Sustainability of Water Resources and Urbanization, *J. Water Resour. Plan. Manag.*, 139(5), 554–564, doi:10.1061/(ASCE)WR.1943-5452.0000302, 2013.
- Giuliani, M. and Castelletti, A.: Assessing the value of cooperation and information exchange in large water resources systems by agent-based optimization, *Water Resour. Res.*, 49(7), 3912–3926, doi:10.1002/wrcr.20287, 2013.
- Giuliani, M., Castelletti, A., Amigoni, F. and Cai, X.: Multiagent Systems and Distributed Constraint Reasoning for Regulatory Mechanism Design in Water Management, *J. Water Resour. Plan. Manag.*, 141(4), 4014068, doi:10.1061/(ASCE)WR.1943-5452.0000463, 2015.
- Jeuland, M., Baker, J., Bartlett, R. and Lacombe, G.: The costs of uncoordinated infrastructure management in multi-reservoir river basins, *Environ. Res. Lett.*, 9(10), 105006, doi:10.1088/1748-9326/9/10/105006, 2014.
- Kanta, L. and Zechman, E.: Complex Adaptive Systems Framework to Assess Supply-Side and Demand-Side Management for Urban Water Resources, *J. Water Resour. Plan. Manag.*, 140(January), 75–85, doi:10.1061/(ASCE)WR.1943-5452.0000301., 2014.
- Kirby, J.M., Mainuddin, M., Podger, G. and Zhang, S., 2006. Basin water use accounting method with application to the Mekong Basin. Proceedings on the International Symposium on Managing Water Supply for Growing Demand, Bangkok, Thailand, 16-20 October 2006, Jakarta. Jakarta, Bangkok: UNESCO
- Manley. 2015.  
<http://www.climatedata.info/discussions/blogger/index.php/index.php?categories=Model>
- Miller, M. L., Ringelman, K. M., Schank, J. C. and Eadie, J. M.: SWAMP: An agent-based model for wetland and waterfowl conservation management, *Simulation*, 90(1), 52–68,



doi:10.1177/0037549713511864, 2014.

Ng, T. L., Eheart, J. W., Cai, X. and Braden, J. B.: An agent-based model of farmer decision-making and water quality impacts at the watershed scale under markets for carbon allowances and a second-generation biofuel crop, *Water Resour. Res.*, 47(9), 1–17, doi:10.1029/2011WR010399, 2011.

Schlüter, M., Leslie, H. and Levin, S.: Managing water-use trade-offs in a semi-arid river delta to sustain multiple ecosystem services: A modeling approach, *Ecol. Res.*, 24(3), 491–503, doi:10.1007/s11284-008-0576-z, 2009.

Schwarz, N. and Ernst, A.: Agent-based modeling of the diffusion of environmental innovations - An empirical approach, *Technol. Forecast. Soc. Change*, 76(4), 497–511, doi:10.1016/j.techfore.2008.03.024, 2009.

Sun, Z. and Muller, D.: A framework for modeling payments for ecosystem services with agent-based models, Bayesian belief networks and opinion dynamics models, *Environ. Model. Softw.*, 45(7), 15–28, doi:http://dx.doi.org/10.1016/j.envsoft.2012.06.007, 2013.

Thompson, J.R., Crawley, A. and Kingston, D.G., 2016. GCM-related uncertainty for river flows and inundation under climate change: the Inner Niger Delta. *Hydrological Sciences Journal*, 61(13), pp.2325-2347.

Yang, Y. C. E., Cai, X., Stipanović, D. M. and Stipanovic, D. M.: A decentralized optimization algorithm for multiagent system-based watershed management, *Water Resour. Res.*, 45(8), 1–18, doi:10.1029/2008WR007634, 2009.

Yang, Y. E., Zhao, J., Cai, X. and Asce, M.: Decentralized optimization method for water allocation management in the Yellow River basin, *J. Water Resour. Plan. Manag.*, 138(August), 313–325, doi:10.1061/(ASCE)WR.1943-5452.0000199., 2011.

You, L., U. Wood-Sichra, S. Fritz, Z. Guo, L. See, and J. Koo. 2014. *Spatial Production Allocation Model (SPAM) 2005 v2.0.*
